# Supplementary material
Source: PubMed Central journal article supplement (PMC4965405)
Supplement: 13311_2016_435_MOESM2_ESM.pdf [file 13311_2016_435_MOESM2_ESM.pdf]

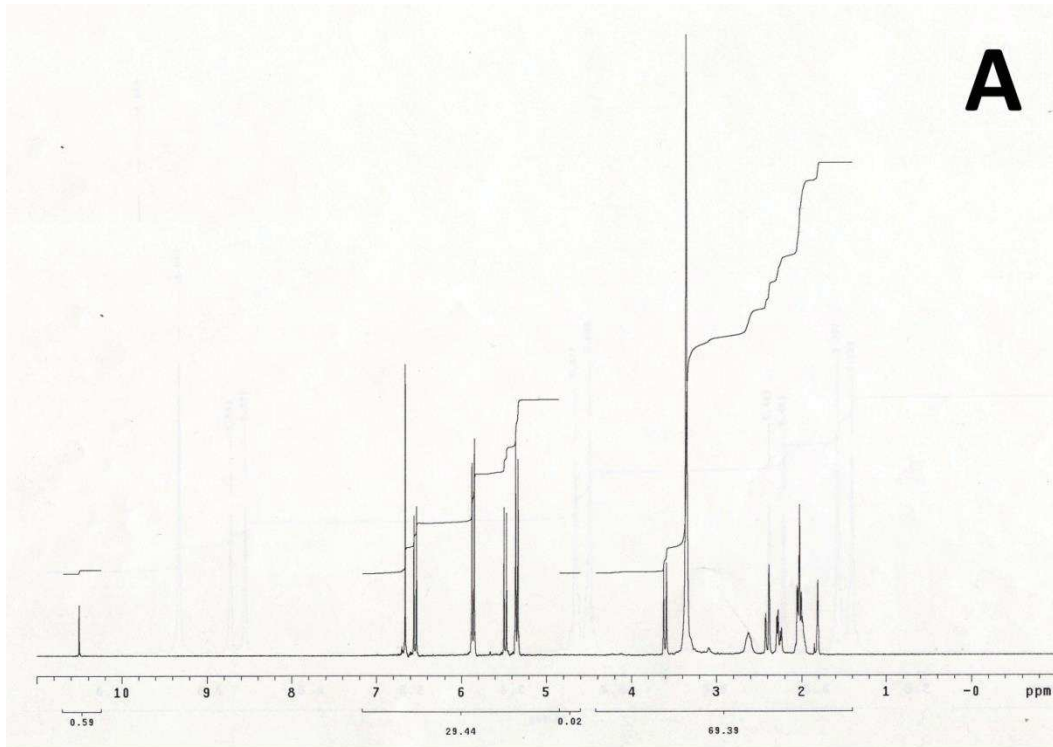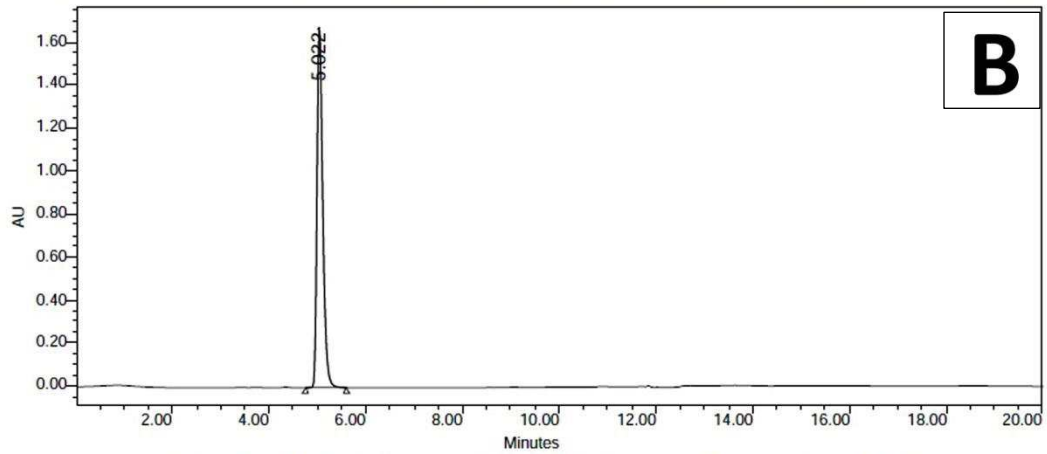

Channel: 2487Channel 1 Channel Desc.: 254 Processing Method: puerarin UV Ch1

|   | Channel Description | RT (min) | Area ( *sec) | % Area | Height ( ) |
|---|---------------------|----------|--------------|--------|------------|
| 1 | 254                 | 5.022    | 13821595     | 100.00 | 1683251    |
