# Supplementary material
Source: PubMed Central journal article supplement (PMC4965405)
Supplement: 13311_2016_435_MOESM4_ESM.pdf [file 13311_2016_435_MOESM4_ESM.pdf]

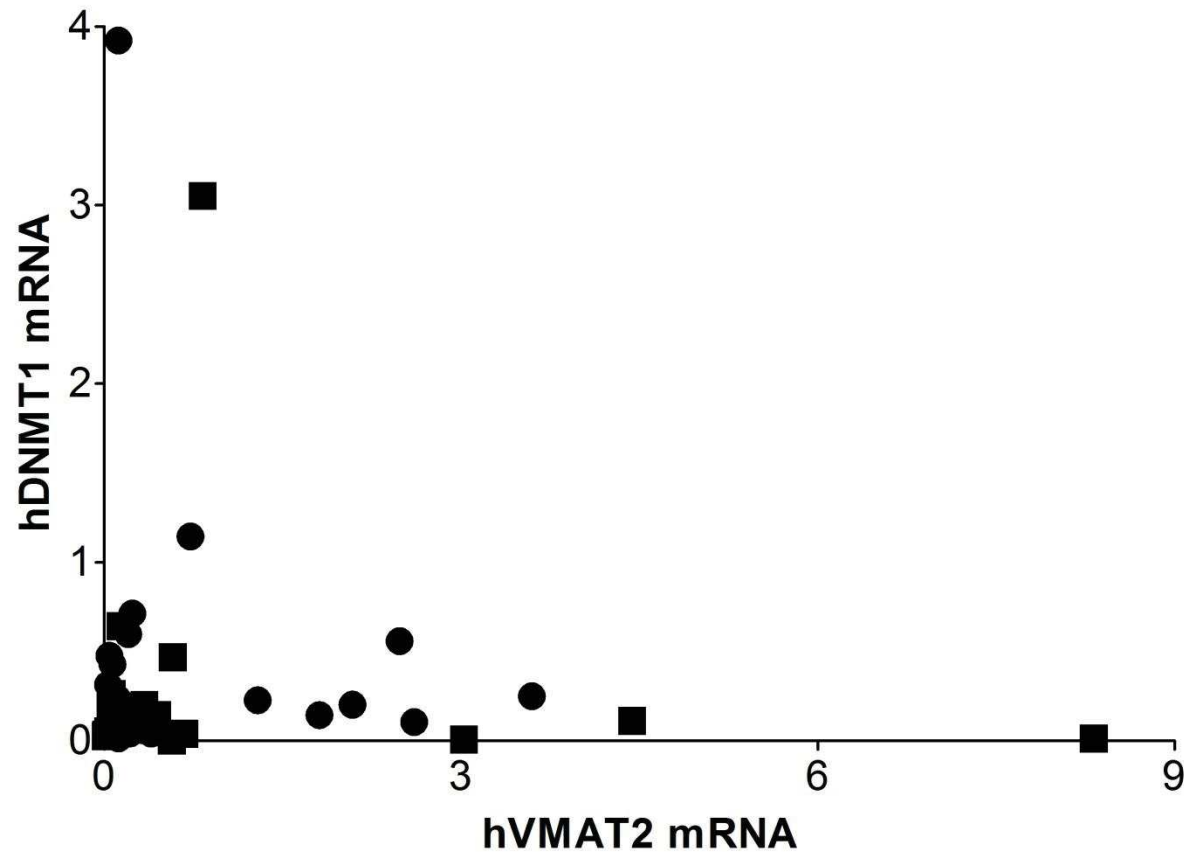

**Supplementary Figure 3.** Tendency of negative correlation between hVMAT2 and hDNMT1 mRNA levels in dopamine neurons isolated from postmortem human midbrain tissue of 40 subjects (dots, controls; square, schizophrenia; normalized by beta-actin).
