# Supplementary material
Source: PubMed Central journal article supplement (PMC4965405)
Supplement: 13311_2016_435_MOESM5_ESM.pdf [file 13311_2016_435_MOESM5_ESM.pdf]

**Supplementary Table 1.** Meta-analysis of three dbGaP GWAS datasets.

| BP*       | SNP         | allele 1 | allele 2 | # of studies | P-value | OR     | kb in <i>hVMT2</i> |
|-----------|-------------|----------|----------|--------------|---------|--------|--------------------|
| 118957579 | rs1678043   | G        | A        | 3            | 0.289   | 0.9608 | -43.005            |
| 118957724 | rs59578980  | T        | C        | 2            | 0.2923  | 1.1509 | -42.86             |
| 118958109 | rs17095818  | A        | G        | 2            | 0.2923  | 1.1509 | -42.475            |
| 118958154 | rs363351    | T        | C        | 2            | 0.3013  | 1.1475 | -42.43             |
| 118958745 | rs3847481   | C        | T        | 2            | 0.2737  | 1.1565 | -41.839            |
| 118958819 | rs3847482   | G        | A        | 2            | 0.2737  | 1.1565 | -41.765            |
| 118959013 | rs3847483   | T        | C        | 2            | 0.2737  | 1.1565 | -41.571            |
| 118959363 | rs17095821  | T        | C        | 2            | 0.2707  | 1.1576 | -41.221            |
| 118959411 | rs60088429  | C        | T        | 2            | 0.2633  | 1.1603 | -41.173            |
| 118959488 | rs17095824  | A        | T        | 2            | 0.2737  | 1.1565 | -41.096            |
| 118959586 | rs60085909  | G        | A        | 2            | 0.2737  | 1.1565 | -40.998            |
| 118959696 | rs61332182  | A        | C        | 2            | 0.2779  | 1.1551 | -40.888            |
| 118959742 | rs56830166  | T        | C        | 2            | 0.2737  | 1.1565 | -40.842            |
| 118959783 | rs59833995  | C        | T        | 2            | 0.2737  | 1.1565 | -40.801            |
| 118960047 | rs113025952 | A        | G        | 2            | 0.2737  | 1.1565 | -40.537            |
| 118960072 | rs112409773 | A        | C        | 2            | 0.2737  | 1.1565 | -40.512            |
| 118960111 | rs112004616 | G        | A        | 2            | 0.3128  | 1.1438 | -40.473            |
| 118960131 | rs111761399 | G        | A        | 2            | 0.2737  | 1.1565 | -40.453            |
| 118960145 | rs111486939 | T        | C        | 2            | 0.3054  | 1.1455 | -40.439            |
| 118960151 | rs112630964 | G        | A        | 2            | 0.2737  | 1.1565 | -40.433            |
| 118960186 | rs1678042   | G        | C        | 3            | 0.2219  | 0.9548 | -40.398            |
| 118960410 | rs363352    | C        | T        | 2            | 0.2737  | 1.1565 | -40.174            |
| 118960530 | rs363306    | T        | C        | 2            | 0.2737  | 1.1565 | -40.054            |
| 118960881 | rs60805690  | A        | G        | 2            | 0.2737  | 1.1565 | -39.703            |
| 118961044 | rs58122384  | C        | A        | 2            | 0.2737  | 1.1565 | -39.54             |
| 118961082 | rs58555599  | T        | C        | 2            | 0.2737  | 1.1565 | -39.502            |
| 118961100 | rs17095831  | A        | G        | 2            | 0.2737  | 1.1565 | -39.484            |
| 118961217 | rs61680075  | A        | G        | 2            | 0.2737  | 1.1565 | -39.367            |
| 118961226 | rs17095832  | G        | A        | 2            | 0.2737  | 1.1565 | -39.358            |
| 118961344 | rs363353    | C        | T        | 3            | 0.2341  | 0.9559 | -39.24             |
| 118961490 | rs363354    | A        | C        | 2            | 0.2737  | 1.1565 | -39.094            |
| 118961555 | rs363307    | T        | G        | 2            | 0.2737  | 1.1565 | -39.029            |
| 118961651 | rs57142493  | G        | A        | 2            | 0.2737  | 1.1565 | -38.933            |
| 118961742 | rs363308    | T        | G        | 2            | 0.9325  | 0.9942 | -38.842            |
| 118961903 | rs363309    | A        | G        | 2            | 0.965   | 0.997  | -38.681            |
| 118962064 | rs363310    | C        | T        | 2            | 0.965   | 0.997  | -38.52             |
| 118962081 | rs363311    | A        | G        | 2            | 0.6089  | 0.9598 | -38.503            |
| 118962103 | rs363357    | T        | C        | 2            | 0.6089  | 0.9598 | -38.481            |
| 118962306 | rs878499    | C        | G        | 2            | 0.8836  | 0.9932 | -38.278            |
| 118962498 | rs2420311   | C        | G        | 2            | 0.2737  | 1.1565 | -38.086            |
| 118962873 | rs963975    | G        | C        | 2            | 0.9736  | 1.0015 | -37.711            |
| 118963380 | rs111642103 | C        | T        | 2            | 0.2737  | 1.1565 | -37.204            |
| 118963457 | rs2429366   | T        | G        | 2            | 0.9694  | 0.9982 | -37.127            |
| 118963469 | rs2429367   | C        | T        | 2            | 0.8814  | 0.9928 | -37.115            |

|           |            |   |   |   |         |        |         |
|-----------|------------|---|---|---|---------|--------|---------|
| 118963970 | rs3858331  | C | T | 2 | 0.2737  | 1.1565 | -36.614 |
| 118964036 | rs1678040  | C | T | 2 | 0.9736  | 1.0015 | -36.548 |
| 118964065 | rs1678039  | T | C | 2 | 0.9736  | 1.0015 | -36.519 |
| 118964875 | rs363312   | T | C | 3 | 0.1961  | 0.9525 | -35.709 |
| 118965116 | rs17095848 | T | C | 2 | 0.3004  | 1.1492 | -35.468 |
| 118965210 | rs1678037  | C | T | 2 | 0.8014  | 0.9881 | -35.374 |
| 118965386 | rs57262314 | A | C | 2 | 0.3004  | 1.1492 | -35.198 |
| 118965534 | rs1678036  | C | T | 2 | 0.9741  | 1.0015 | -35.05  |
| 118966171 | rs1626211  | A | C | 2 | 0.9599  | 1.0023 | -34.413 |
| 118966996 | rs2619111  | A | G | 3 | 0.2383  | 0.957  | -33.588 |
| 118967460 | rs363313   | A | G | 2 | 0.521   | 1.0875 | -33.124 |
| 118967507 | rs3026039  | T | G | 2 | 0.3312  | 1.139  | -33.077 |
| 118967604 | rs363314   | T | G | 3 | 0.2432  | 0.9574 | -32.98  |
| 118968164 | rs2619110  | C | T | 2 | 0.8393  | 0.9904 | -32.42  |
| 118968222 | rs2803827  | G | T | 2 | 0.8337  | 0.9901 | -32.362 |
| 118968682 | rs3847484  | C | G | 2 | 0.3312  | 1.139  | -31.902 |
| 118969346 | rs363315   | C | T | 2 | 0.3343  | 1.1356 | -31.238 |
| 118970425 | rs2619109  | T | C | 3 | 0.5014  | 0.9716 | -30.159 |
| 118970630 | rs56866787 | T | C | 2 | 0.3322  | 1.1375 | -29.954 |
| 118972083 | rs11197927 | C | T | 2 | 0.7809  | 0.9767 | -28.501 |
| 118972540 | rs2532816  | A | G | 3 | 0.7706  | 0.9878 | -28.044 |
| 118973145 | rs3858335  | A | C | 2 | 0.3322  | 1.1375 | -27.439 |
| 118973516 | rs11197928 | T | C | 2 | 0.6369  | 0.9605 | -27.068 |
| 118973556 | rs17095891 | A | G | 2 | 0.3322  | 1.1375 | -27.028 |
| 118973715 | rs17095893 | G | A | 2 | 0.3617  | 1.129  | -26.869 |
| 118974784 | rs2619108  | T | C | 2 | 0.6438  | 0.9615 | -25.8   |
| 118976075 | rs73387889 | T | G | 2 | 0.1602  | 1.2041 | -24.509 |
| 118976295 | rs2619107  | C | G | 2 | 0.683   | 0.9642 | -24.289 |
| 118976458 | rs363362   | A | G | 2 | 0.1844  | 1.1923 | -24.126 |
| 118977122 | rs2619106  | G | A | 3 | 0.034   | 0.921  | -23.462 |
| 118977123 | rs2619105  | C | A | 3 | 0.0375  | 0.9225 | -23.461 |
| 118977576 | rs12571226 | A | G | 2 | 0.1293  | 1.2182 | -23.008 |
| 118979967 | rs363363   | A | C | 2 | 0.8967  | 1.0172 | -20.617 |
| 118980138 | rs2803825  | A | G | 2 | 0.5361  | 0.9494 | -20.446 |
| 118981071 | rs2803823  | T | C | 3 | 0.09457 | 0.9044 | -19.513 |
| 118981692 | rs363364   | A | C | 2 | 0.7358  | 1.0473 | -18.892 |
| 118981820 | rs363317   | A | C | 2 | 0.9244  | 0.9917 | -18.764 |
| 118981965 | rs363365   | C | A | 2 | 0.9563  | 0.9952 | -18.619 |
| 118982388 | rs363318   | C | T | 2 | 0.7498  | 1.0437 | -18.196 |
| 118982402 | rs363366   | G | A | 2 | 0.9203  | 0.9913 | -18.182 |
| 118982582 | rs363319   | C | G | 2 | 0.7498  | 1.0437 | -18.002 |
| 118983140 | rs363320   | T | C | 2 | 0.7498  | 1.0437 | -17.444 |
| 118983815 | rs2619103  | G | A | 3 | 0.01094 | 0.9053 | -16.769 |
| 118984464 | rs3026047  | T | C | 3 | 0.01125 | 0.898  | -16.12  |
| 118985005 | rs363321   | C | T | 2 | 0.7381  | 1.0458 | -15.579 |
| 118985118 | rs2619102  | G | A | 3 | 0.01859 | 0.9123 | -15.466 |
| 118985215 | rs58968504 | C | G | 2 | 0.6339  | 1.0678 | -15.369 |

|           |             |   |   |   |          |        |         |
|-----------|-------------|---|---|---|----------|--------|---------|
| 118985485 | rs2619101   | G | A | 2 | 0.7381   | 1.0458 | -15.099 |
| 118985613 | rs2803820   | A | G | 3 | 0.01524  | 0.9098 | -14.971 |
| 118985644 | rs57663418  | T | C | 2 | 0.6339   | 1.0678 | -14.94  |
| 118986090 | rs58634906  | A | G | 2 | 0.4067   | 0.9134 | -14.494 |
| 118986144 | rs363322    | A | G | 2 | 0.7417   | 1.0451 | -14.44  |
| 118986396 | rs363371    | A | G | 3 | 0.01136  | 0.8983 | -14.188 |
| 118986713 | rs363323    | T | A | 3 | 0.9336   | 1.0063 | -13.871 |
| 118986749 | rs17095936  | C | T | 2 | 0.6137   | 1.0776 | -13.835 |
| 118986857 | rs28634565  | A | C | 2 | 0.5381   | 1.0885 | -13.727 |
| 118986859 | rs2619099   | G | A | 2 | 0.6885   | 1.0553 | -13.725 |
| 118986928 | rs2619098   | G | A | 2 | 0.6895   | 1.0549 | -13.656 |
| 118987339 | rs2803818   | C | A | 2 | 0.514    | 0.9472 | -13.245 |
| 118987670 | rs2532798   | G | T | 3 | 0.01616  | 0.9109 | -12.914 |
| 118987781 | rs7393602   | C | A | 2 | 0.2943   | 0.8969 | -12.803 |
| 118988392 | rs58610313  | G | C | 2 | 0.5359   | 1.089  | -12.192 |
| 118988797 | rs78664257  | A | G | 2 | 0.4136   | 0.922  | -11.787 |
| 118989162 | rs363324    | G | A | 3 | 0.01879  | 0.9128 | -11.422 |
| 118989519 | rs60694093  | A | G | 2 | 0.7434   | 1.0452 | -11.065 |
| 118989604 | rs3981210   | A | G | 2 | 0.5516   | 0.9517 | -10.98  |
| 118990297 | rs363325    | A | G | 2 | 0.5459   | 0.951  | -10.287 |
| 118990516 | rs363326    | A | G | 2 | 0.5237   | 0.9483 | -10.068 |
| 118990782 | rs363327    | A | G | 2 | 0.57     | 0.9538 | -9.802  |
| 118991126 | rs363328    | C | T | 2 | 0.5742   | 0.9543 | -9.458  |
| 118991550 | rs74159130  | A | G | 2 | 0.3383   | 0.9052 | -9.034  |
| 118991582 | rs363329    | T | C | 2 | 0.5784   | 0.9547 | -9.002  |
| 118991695 | rs2532799   | C | T | 3 | 0.01498  | 0.9096 | -8.889  |
| 118991727 | rs12414893  | T | C | 2 | 0.6683   | 0.9515 | -8.857  |
| 118991768 | rs12414919  | A | G | 2 | 0.6683   | 0.9515 | -8.816  |
| 118991774 | rs12414934  | A | G | 2 | 0.5503   | 0.9514 | -8.81   |
| 118992558 | rs10886050  | A | G | 3 | 0.007207 | 0.8921 | -8.026  |
| 118992584 | rs2619097   | C | A | 2 | 0.3313   | 0.9225 | -8      |
| 118993210 | rs363373    | C | T | 2 | 0.5232   | 1.0946 | -7.374  |
| 118994479 | rs10886051  | A | C | 3 | 0.01425  | 0.9023 | -6.105  |
| 118994530 | rs2532801   | A | G | 2 | 0.09755  | 0.9234 | -6.054  |
| 118994838 | rs363330    | G | A | 2 | 0.3507   | 0.9258 | -5.746  |
| 118996097 | rs7099849   | G | A | 2 | 0.2996   | 0.896  | -4.487  |
| 118996115 | rs4081624   | C | A | 2 | 0.09578  | 0.9251 | -4.469  |
| 118996351 | rs10689256# |   |   |   |          |        | -4.233  |
| 118997875 | rs2532802   | C | G | 2 | 0.7848   | 1.0389 | -2.709  |
| 118998127 | rs2619096#  |   |   |   |          |        | -2.457  |
| 118998525 | rs34074668# |   |   |   |          |        | -2.059  |
| 118999932 | rs2283135   | G | C | 2 | 0.2694   | 0.8895 | -0.652  |
| 119000528 | rs60912143  | A | G | 2 | 0.8304   | 1.0323 | -0.056  |
| 119000572 | rs60543597  | A | G | 2 | 0.1081   | 0.926  | -0.012  |
| 119001817 | rs2619093   | C | T | 2 | 0.03822  | 0.913  | 1.233   |
| 119002489 | rs149461310 | T | C | 2 | 0.2575   | 0.8824 | 1.905   |
| 119002540 | rs11197932  | A | G | 3 | 0.03468  | 0.9168 | 1.956   |

|           |            |   |   |   |         |        |        |
|-----------|------------|---|---|---|---------|--------|--------|
| 119002667 | rs363332   | A | G | 3 | 0.03077 | 0.9151 | 2.083  |
| 119003161 | rs61560104 | G | A | 2 | 0.8202  | 1.0339 | 2.577  |
| 119003308 | rs2240779  | G | C | 2 | 0.2016  | 0.8685 | 2.724  |
| 119003564 | rs363387   | G | T | 2 | 0.2016  | 0.8685 | 2.98   |
| 119004079 | rs363390   | C | G | 3 | 0.03411 | 0.9158 | 3.495  |
| 119004995 | rs363334   | G | C | 2 | 0.079   | 0.9206 | 4.411  |
| 119006945 | rs2283136  | G | A | 2 | 0.2629  | 0.8867 | 6.361  |
| 119007385 | rs363397   | G | C | 2 | 0.2883  | 0.8921 | 6.801  |
| 119007549 | rs2283137  | T | C | 3 | 0.04088 | 0.9191 | 6.965  |
| 119007980 | rs363336   | A | C | 2 | 0.3113  | 0.8967 | 7.396  |
| 119008485 | rs363337   | C | T | 2 | 0.1149  | 0.9291 | 7.901  |
| 119008728 | rs2299615  | G | A | 2 | 0.2925  | 0.8927 | 8.144  |
| 119008871 | rs363399   | C | T | 3 | 0.05508 | 0.9244 | 8.287  |
| 119008896 | rs363400   | A | C | 2 | 0.2925  | 0.8927 | 8.312  |
| 119009389 | rs363338   | C | T | 2 | 0.06284 | 0.9221 | 8.805  |
| 119009631 | rs363404   | T | C | 3 | 0.04458 | 0.9208 | 9.047  |
| 119009912 | rs3753127  | A | G | 2 | 0.7514  | 1.046  | 9.328  |
| 119009966 | rs2532805  | G | A | 2 | 0.2422  | 0.8828 | 9.382  |
| 119010185 | rs2803815  | C | T | 2 | 0.2599  | 0.887  | 9.601  |
| 119010224 | rs7899301  | A | G | 2 | 0.717   | 1.0506 | 9.64   |
| 119010412 | rs363339   | T | C | 2 | 0.1536  | 0.9351 | 9.828  |
| 119010413 | rs363340   | C | T | 2 | 0.1536  | 0.9351 | 9.829  |
| 119010422 | rs363405   | A | G | 2 | 0.6397  | 1.0705 | 9.838  |
| 119010465 | rs363341   | T | C | 2 | 0.1293  | 0.9338 | 9.881  |
| 119011795 | rs17095973 | A | G | 2 | 0.5927  | 1.0849 | 11.211 |
| 119014929 | rs363419   | T | C | 3 | 0.8376  | 0.9851 | 14.345 |
| 119018031 | rs363221   | T | C | 3 | 0.8512  | 0.9868 | 17.447 |
| 119018260 | rs79731304 | C | T | 3 | 0.9754  | 1.0022 | 17.676 |
| 119018679 | rs2283138  | G | A | 2 | 0.3738  | 0.9437 | 18.095 |
| 119019126 | rs929493   | C | T | 2 | 0.7201  | 0.9811 | 18.542 |
| 119019177 | rs1860404  | T | C | 2 | 0.6788  | 0.9712 | 18.593 |
| 119019467 | rs363251   | G | A | 2 | 0.3263  | 1.0411 | 18.883 |
| 119019658 | rs11197936 | G | A | 2 | 0.06757 | 1.0783 | 19.074 |
| 119022573 | rs363224   | C | A | 2 | 0.9915  | 1.0004 | 21.989 |
| 119024502 | rs363225   | C | T | 2 | 0.9101  | 0.9954 | 23.918 |
| 119028940 | rs2532810  | A | G | 3 | 0.5379  | 0.9544 | 28.356 |
| 119032488 | rs363231   | A | G | 3 | 0.5091  | 0.9512 | 31.904 |
| 119043554 | rs363294   | T | C | 3 | 0.4084  | 0.9398 | 42.97  |
| 119051788 | rs2532812  | A | G | 3 | 0.6593  | 0.9668 | 51.204 |
| 119064546 | rs2490629  | T | C | 3 | 0.6947  | 0.9705 | 63.962 |

\* According to 1000 Genome Project.

# Markers typed in the family study only.
