# Supplementary material
Source: PubMed Central journal article supplement (PMC4965405)
Supplement: 13311_2016_435_MOESM6_ESM.pdf [file 13311_2016_435_MOESM6_ESM.pdf]

**Supplementary Table 2. Meta-analysis of gender-stratified association.**

| BP        | SNP         | A1 | A2 | N | Males |       |       |       |             | Females |       |       |       |             |
|-----------|-------------|----|----|---|-------|-------|-------|-------|-------------|---------|-------|-------|-------|-------------|
|           |             |    |    |   | P     | P(R)  | OR    | OR(R) | log P-value | P       | P(R)  | OR    | OR(R) | log P-value |
| 118957579 | rs1678043   | G  | A  | 3 | 0.071 | 0.080 | 0.907 | 0.905 | 1.147       | 0.945   | 0.945 | 0.996 | 0.996 | 0.024       |
| 118957724 | rs59578980  | T  | C  | 2 | 0.857 | 0.857 | 1.034 | 1.034 | 0.067       | 0.371   | 0.371 | 1.203 | 1.203 | 0.431       |
| 118958109 | rs17095818  | A  | G  | 2 | 0.857 | 0.857 | 1.034 | 1.034 | 0.067       | 0.371   | 0.371 | 1.203 | 1.203 | 0.431       |
| 118958154 | rs363351    | T  | C  | 2 | 0.811 | 0.811 | 1.045 | 1.045 | 0.091       | 0.411   | 0.411 | 1.184 | 1.184 | 0.386       |
| 118958745 | rs3847481   | C  | T  | 2 | 0.763 | 0.763 | 1.057 | 1.057 | 0.117       | 0.411   | 0.411 | 1.184 | 1.184 | 0.386       |
| 118958819 | rs3847482   | G  | A  | 2 | 0.763 | 0.763 | 1.057 | 1.057 | 0.117       | 0.411   | 0.411 | 1.184 | 1.184 | 0.386       |
| 118959013 | rs3847483   | T  | C  | 2 | 0.763 | 0.763 | 1.057 | 1.057 | 0.117       | 0.411   | 0.411 | 1.184 | 1.184 | 0.386       |
| 118959363 | rs17095821  | T  | C  | 2 | 0.753 | 0.753 | 1.060 | 1.060 | 0.123       | 0.413   | 0.413 | 1.183 | 1.183 | 0.384       |
| 118959411 | rs60088429  | C  | T  | 2 | 0.766 | 0.766 | 1.056 | 1.056 | 0.116       | 0.398   | 0.398 | 1.190 | 1.190 | 0.401       |
| 118959488 | rs17095824  | A  | T  | 2 | 0.763 | 0.763 | 1.057 | 1.057 | 0.117       | 0.411   | 0.411 | 1.184 | 1.184 | 0.386       |
| 118959586 | rs60085909  | G  | A  | 2 | 0.763 | 0.763 | 1.057 | 1.057 | 0.117       | 0.411   | 0.411 | 1.184 | 1.184 | 0.386       |
| 118959696 | rs61332182  | A  | C  | 2 | 0.769 | 0.769 | 1.056 | 1.056 | 0.114       | 0.415   | 0.415 | 1.182 | 1.182 | 0.382       |
| 118959742 | rs56830166  | T  | C  | 2 | 0.763 | 0.763 | 1.057 | 1.057 | 0.117       | 0.411   | 0.411 | 1.184 | 1.184 | 0.386       |
| 118959783 | rs59833995  | C  | T  | 2 | 0.763 | 0.763 | 1.057 | 1.057 | 0.117       | 0.411   | 0.411 | 1.184 | 1.184 | 0.386       |
| 118960047 | rs113025952 | A  | G  | 2 | 0.763 | 0.763 | 1.057 | 1.057 | 0.117       | 0.411   | 0.411 | 1.184 | 1.184 | 0.386       |
| 118960072 | rs112409773 | A  | C  | 2 | 0.763 | 0.763 | 1.057 | 1.057 | 0.117       | 0.411   | 0.411 | 1.184 | 1.184 | 0.386       |
| 118960111 | rs112004616 | G  | A  | 2 | 0.829 | 0.829 | 1.041 | 1.041 | 0.081       | 0.420   | 0.420 | 1.180 | 1.180 | 0.377       |
| 118960131 | rs111761399 | G  | A  | 2 | 0.763 | 0.763 | 1.057 | 1.057 | 0.117       | 0.411   | 0.411 | 1.184 | 1.184 | 0.386       |
| 118960145 | rs111486939 | T  | C  | 2 | 0.852 | 0.852 | 1.035 | 1.035 | 0.069       | 0.411   | 0.411 | 1.184 | 1.184 | 0.386       |
| 118960151 | rs112630964 | G  | A  | 2 | 0.763 | 0.763 | 1.057 | 1.057 | 0.117       | 0.411   | 0.411 | 1.184 | 1.184 | 0.386       |
| 118960186 | rs1678042   | G  | C  | 3 | 0.069 | 0.090 | 0.907 | 0.901 | 1.159       | 0.757   | 0.757 | 0.983 | 0.983 | 0.121       |
| 118960410 | rs363352    | C  | T  | 2 | 0.763 | 0.763 | 1.057 | 1.057 | 0.117       | 0.411   | 0.411 | 1.184 | 1.184 | 0.386       |
| 118960530 | rs363306    | T  | C  | 2 | 0.763 | 0.763 | 1.057 | 1.057 | 0.117       | 0.411   | 0.411 | 1.184 | 1.184 | 0.386       |
| 118960881 | rs60805690  | A  | G  | 2 | 0.763 | 0.763 | 1.057 | 1.057 | 0.117       | 0.411   | 0.411 | 1.184 | 1.184 | 0.386       |
| 118961044 | rs58122384  | C  | A  | 2 | 0.763 | 0.763 | 1.057 | 1.057 | 0.117       | 0.411   | 0.411 | 1.184 | 1.184 | 0.386       |
| 118961082 | rs58555599  | T  | C  | 2 | 0.763 | 0.763 | 1.057 | 1.057 | 0.117       | 0.411   | 0.411 | 1.184 | 1.184 | 0.386       |
| 118961100 | rs17095831  | A  | G  | 2 | 0.763 | 0.763 | 1.057 | 1.057 | 0.117       | 0.411   | 0.411 | 1.184 | 1.184 | 0.386       |
| 118961217 | rs61680075  | A  | G  | 2 | 0.763 | 0.763 | 1.057 | 1.057 | 0.117       | 0.411   | 0.411 | 1.184 | 1.184 | 0.386       |
| 118961226 | rs17095832  | G  | A  | 2 | 0.763 | 0.763 | 1.057 | 1.057 | 0.117       | 0.411   | 0.411 | 1.184 | 1.184 | 0.386       |
| 118961344 | rs363353    | C  | T  | 3 | 0.070 | 0.113 | 0.907 | 0.895 | 1.154       | 0.788   | 0.771 | 0.985 | 0.983 | 0.103       |
| 118961490 | rs363354    | A  | C  | 2 | 0.763 | 0.763 | 1.057 | 1.057 | 0.117       | 0.411   | 0.411 | 1.184 | 1.184 | 0.386       |

|           |             |   |   |   |       |       |       |       |       |       |       |       |       |       |
|-----------|-------------|---|---|---|-------|-------|-------|-------|-------|-------|-------|-------|-------|-------|
| 118961555 | rs363307    | T | G | 2 | 0.763 | 0.763 | 1.057 | 1.057 | 0.117 | 0.411 | 0.411 | 1.184 | 1.184 | 0.386 |
| 118961651 | rs57142493  | G | A | 2 | 0.763 | 0.763 | 1.057 | 1.057 | 0.117 | 0.411 | 0.411 | 1.184 | 1.184 | 0.386 |
| 118961742 | rs363308    | T | G | 2 | 0.358 | 0.358 | 0.917 | 0.917 | 0.446 | 0.754 | 0.754 | 1.033 | 1.033 | 0.123 |
| 118961903 | rs363309    | A | G | 2 | 0.390 | 0.390 | 0.922 | 0.922 | 0.409 | 0.754 | 0.754 | 1.033 | 1.033 | 0.123 |
| 118962064 | rs363310    | C | T | 2 | 0.390 | 0.390 | 0.922 | 0.922 | 0.409 | 0.754 | 0.754 | 1.033 | 1.033 | 0.123 |
| 118962081 | rs363311    | A | G | 2 | 0.380 | 0.380 | 0.907 | 0.907 | 0.420 | 0.918 | 0.917 | 0.987 | 0.987 | 0.037 |
| 118962103 | rs363357    | T | C | 2 | 0.380 | 0.380 | 0.907 | 0.907 | 0.420 | 0.918 | 0.917 | 0.987 | 0.987 | 0.037 |
| 118962306 | rs878499    | C | G | 2 | 0.533 | 0.533 | 0.960 | 0.960 | 0.273 | 0.932 | 0.932 | 1.006 | 1.006 | 0.031 |
| 118962498 | rs2420311   | C | G | 2 | 0.763 | 0.763 | 1.057 | 1.057 | 0.117 | 0.411 | 0.411 | 1.184 | 1.184 | 0.386 |
| 118962873 | rs963975    | G | C | 2 | 0.721 | 0.721 | 0.977 | 0.977 | 0.142 | 0.902 | 0.902 | 1.009 | 1.009 | 0.045 |
| 118963380 | rs111642103 | C | T | 2 | 0.763 | 0.763 | 1.057 | 1.057 | 0.117 | 0.411 | 0.411 | 1.184 | 1.184 | 0.386 |
| 118963457 | rs2429366   | T | G | 2 | 0.671 | 0.671 | 0.973 | 0.973 | 0.173 | 0.930 | 0.930 | 1.006 | 1.006 | 0.031 |
| 118963469 | rs2429367   | C | T | 2 | 0.839 | 0.839 | 0.986 | 0.986 | 0.076 | 0.900 | 0.900 | 0.991 | 0.991 | 0.046 |
| 118963970 | rs3858331   | C | T | 2 | 0.763 | 0.763 | 1.057 | 1.057 | 0.117 | 0.411 | 0.411 | 1.184 | 1.184 | 0.386 |
| 118964036 | rs1678040   | C | T | 2 | 0.721 | 0.721 | 0.977 | 0.977 | 0.142 | 0.902 | 0.902 | 1.009 | 1.009 | 0.045 |
| 118964065 | rs1678039   | T | C | 2 | 0.721 | 0.721 | 0.977 | 0.977 | 0.142 | 0.902 | 0.902 | 1.009 | 1.009 | 0.045 |
| 118964875 | rs363312    | T | C | 3 |       | 0.076 | 0.899 | 0.891 |       | 0.825 | 0.825 | 0.988 | 0.988 | 0.083 |
| 118965116 | rs17095848  | T | C | 2 | 0.677 | 0.677 | 1.080 | 1.080 | 0.170 | 0.588 | 0.588 | 1.120 | 1.120 | 0.231 |
| 118965210 | rs1678037   | C | T | 2 | 0.717 | 0.717 | 0.976 | 0.976 | 0.145 | 0.988 | 0.988 | 0.999 | 0.999 | 0.005 |
| 118965386 | rs57262314  | A | C | 2 | 0.677 | 0.677 | 1.080 | 1.080 | 0.170 | 0.588 | 0.588 | 1.120 | 1.120 | 0.231 |
| 118965534 | rs1678036   | C | T | 2 | 0.697 | 0.697 | 0.975 | 0.975 | 0.157 | 0.811 | 0.811 | 1.017 | 1.017 | 0.091 |
| 118966171 | rs1626211   | A | C | 2 | 0.760 | 0.760 | 0.980 | 0.980 | 0.119 | 0.827 | 0.827 | 1.015 | 1.015 | 0.083 |
| 118966996 | rs2619111   | A | G | 3 | 0.071 | 0.103 | 0.909 | 0.902 | 1.147 | 0.895 | 0.895 | 0.993 | 0.993 | 0.048 |
| 118967460 | rs363313    | A | G | 2 | 0.874 | 0.874 | 1.029 | 1.029 | 0.058 | 0.818 | 0.818 | 1.048 | 1.048 | 0.087 |
| 118967507 | rs3026039   | T | G | 2 | 0.677 | 0.677 | 1.080 | 1.080 | 0.170 | 0.640 | 0.640 | 1.103 | 1.103 | 0.194 |
| 118967604 | rs363314    | T | G | 3 | 0.076 | 0.113 | 0.910 | 0.902 | 1.121 | 0.904 | 0.904 | 0.993 | 0.993 | 0.044 |
| 118968164 | rs2619110   | C | T | 2 | 0.761 | 0.761 | 0.980 | 0.980 | 0.119 | 0.924 | 0.924 | 1.007 | 1.007 | 0.034 |
| 118968222 | rs2803827   | G | T | 2 | 0.805 | 0.805 | 0.983 | 0.983 | 0.094 | 0.991 | 0.991 | 0.999 | 0.999 | 0.004 |
| 118968682 | rs3847484   | C | G | 2 | 0.677 | 0.677 | 1.080 | 1.080 | 0.170 | 0.640 | 0.640 | 1.103 | 1.103 | 0.194 |
| 118969346 | rs363315    | C | T | 2 | 0.826 | 0.826 | 1.040 | 1.040 | 0.083 | 0.637 | 0.637 | 1.104 | 1.104 | 0.196 |
| 118970425 | rs2619109   | T | C | 3 | 0.598 | 0.598 | 0.968 | 0.968 | 0.224 | 0.616 | 0.616 | 0.968 | 0.968 | 0.211 |
| 118970630 | rs56866787  | T | C | 2 | 0.752 | 0.752 | 1.059 | 1.059 | 0.124 | 0.637 | 0.637 | 1.104 | 1.104 | 0.196 |
| 118972083 | rs11197927  | C | T | 2 | 0.692 | 0.692 | 0.954 | 0.954 | 0.160 | 0.916 | 0.916 | 0.987 | 0.987 | 0.038 |
| 118972540 | rs2532816   | A | G | 3 | 0.593 | 0.593 | 0.968 | 0.968 | 0.227 | 0.979 | 0.979 | 0.998 | 0.998 | 0.009 |

|           |            |   |   |   |       |       |       |       |       |       |       |       |       |       |
|-----------|------------|---|---|---|-------|-------|-------|-------|-------|-------|-------|-------|-------|-------|
| 118973145 | rs3858335  | A | C | 2 | 0.752 | 0.752 | 1.059 | 1.059 | 0.124 | 0.637 | 0.637 | 1.104 | 1.104 | 0.196 |
| 118973516 | rs11197928 | T | C | 2 | 0.572 | 0.572 | 0.935 | 0.935 | 0.242 | 0.860 | 0.860 | 0.977 | 0.977 | 0.066 |
| 118973556 | rs17095891 | A | G | 2 | 0.752 | 0.752 | 1.059 | 1.059 | 0.124 | 0.637 | 0.637 | 1.104 | 1.104 | 0.196 |
| 118973715 | rs17095893 | G | A | 2 | 0.752 | 0.752 | 1.059 | 1.059 | 0.124 | 0.732 | 0.732 | 1.075 | 1.075 | 0.136 |
| 118974784 | rs2619108  | T | C | 2 | 0.515 | 0.515 | 0.925 | 0.925 | 0.288 | 0.928 | 0.928 | 0.988 | 0.988 | 0.032 |
| 118976075 | rs73387889 | T | G | 2 | 0.674 | 0.674 | 1.080 | 1.080 | 0.172 | 0.262 | 0.262 | 1.256 | 1.256 | 0.582 |
| 118976295 | rs2619107  | C | G | 2 | 0.480 | 0.480 | 0.915 | 0.915 | 0.319 | 0.839 | 0.839 | 1.028 | 1.028 | 0.076 |
| 118976458 | rs363362   | A | G | 2 | 0.725 | 0.725 | 1.067 | 1.067 | 0.140 | 0.268 | 0.268 | 1.253 | 1.253 | 0.572 |
| 118977122 | rs2619106  | G | A | 3 |       |       | 0.880 | 0.880 |       | 0.334 | 0.334 | 0.946 | 0.946 | 0.476 |
| 118977123 | rs2619105  | C | A | 3 |       |       | 0.882 | 0.882 |       | 0.346 | 0.346 | 0.947 | 0.947 | 0.461 |
| 118977576 | rs12571226 | A | G | 2 | 0.635 | 0.635 | 1.089 | 1.089 | 0.197 | 0.240 | 0.240 | 1.267 | 1.267 | 0.620 |
| 118979967 | rs363363   | A | C | 2 | 0.555 | 0.555 | 1.117 | 1.117 | 0.256 | 0.522 | 0.522 | 0.878 | 0.878 | 0.282 |
| 118980138 | rs2803825  | A | G | 2 | 0.660 | 0.660 | 0.949 | 0.949 | 0.180 | 0.619 | 0.619 | 0.938 | 0.938 | 0.208 |
| 118981071 | rs2803823  | T | C | 3 | 0.060 | 0.103 | 0.853 | 0.824 | 1.225 | 0.483 | 0.471 | 0.939 | 0.902 | 0.316 |
| 118981692 | rs363364   | A | C | 2 | 0.928 | 0.928 | 1.017 | 1.017 | 0.033 | 0.958 | 0.958 | 0.989 | 0.989 | 0.019 |
| 118981820 | rs363317   | A | C | 2 | 0.750 | 0.750 | 1.040 | 1.040 | 0.125 | 0.355 | 0.390 | 0.881 | 0.853 | 0.450 |
| 118981965 | rs363365   | C | A | 2 | 0.765 | 0.765 | 1.037 | 1.037 | 0.116 | 0.408 | 0.427 | 0.893 | 0.870 | 0.390 |
| 118982388 | rs363318   | C | T | 2 | 0.918 | 0.918 | 0.981 | 0.981 | 0.037 | 0.865 | 0.865 | 1.036 | 1.036 | 0.063 |
| 118982402 | rs363366   | G | A | 2 | 0.838 | 0.838 | 1.025 | 1.025 | 0.077 | 0.431 | 0.431 | 0.899 | 0.899 | 0.365 |
| 118982582 | rs363319   | C | G | 2 | 0.918 | 0.918 | 0.981 | 0.981 | 0.037 | 0.865 | 0.865 | 1.036 | 1.036 | 0.063 |
| 118983140 | rs363320   | T | C | 2 | 0.918 | 0.918 | 0.981 | 0.981 | 0.037 | 0.865 | 0.865 | 1.036 | 1.036 | 0.063 |
| 118983815 | rs2619103  | G | A | 3 |       |       | 0.860 | 0.860 |       | 0.362 | 0.362 | 0.948 | 0.948 | 0.442 |
| 118984464 | rs3026047  | T | C | 3 |       |       | 0.839 | 0.839 |       | 0.619 | 0.619 | 0.969 | 0.969 | 0.209 |
| 118985005 | rs363321   | C | T | 2 | 0.921 | 0.921 | 0.982 | 0.982 | 0.036 | 0.856 | 0.856 | 1.039 | 1.039 | 0.068 |
| 118985118 | rs2619102  | G | A | 3 |       |       | 0.868 | 0.868 |       | 0.411 | 0.411 | 0.953 | 0.953 | 0.387 |
| 118985215 | rs58968504 | C | G | 2 | 0.928 | 0.928 | 1.017 | 1.017 | 0.033 | 0.916 | 0.916 | 1.023 | 1.023 | 0.038 |
| 118985485 | rs2619101  | G | A | 2 | 0.921 | 0.921 | 0.982 | 0.982 | 0.036 | 0.856 | 0.856 | 1.039 | 1.039 | 0.068 |
| 118985613 | rs2803820  | A | G | 3 |       |       | 0.867 | 0.867 |       | 0.375 | 0.375 | 0.950 | 0.950 | 0.426 |
| 118985644 | rs57663418 | T | C | 2 | 0.928 | 0.928 | 1.017 | 1.017 | 0.033 | 0.916 | 0.916 | 1.023 | 1.023 | 0.038 |
| 118986090 | rs58634906 | A | G | 2 | 0.897 | 0.897 | 0.980 | 0.980 | 0.047 | 0.235 | 0.318 | 0.816 | 0.754 | 0.629 |
| 118986144 | rs363322   | A | G | 2 | 0.921 | 0.921 | 0.982 | 0.982 | 0.036 | 0.856 | 0.856 | 1.039 | 1.039 | 0.068 |
| 118986396 | rs363371   | A | G | 3 |       |       | 0.840 | 0.840 |       | 0.605 | 0.605 | 0.968 | 0.968 | 0.218 |
| 118986713 | rs363323   | T | A | 3 | 0.643 | 0.643 | 1.050 | 1.051 | 0.192 | 0.339 | 0.339 | 0.895 | 0.895 | 0.469 |
| 118986749 | rs17095936 | C | T | 2 | 0.692 | 0.692 | 1.085 | 1.085 | 0.160 | 0.855 | 0.855 | 0.958 | 0.958 | 0.068 |

|           |            |   |   |   |       |       |       |       |       |       |       |       |       |       |
|-----------|------------|---|---|---|-------|-------|-------|-------|-------|-------|-------|-------|-------|-------|
| 118986857 | rs28634565 | A | C | 2 | 0.841 | 0.841 | 1.039 | 1.039 | 0.075 | 0.804 | 0.804 | 1.055 | 1.055 | 0.095 |
| 118986859 | rs2619099  | G | A | 2 | 0.994 | 0.994 | 1.002 | 1.002 | 0.003 | 0.856 | 0.856 | 1.039 | 1.039 | 0.068 |
| 118986928 | rs2619098  | G | A | 2 | 0.941 | 0.941 | 1.014 | 1.014 | 0.027 | 0.912 | 0.912 | 1.023 | 1.023 | 0.040 |
| 118987339 | rs2803818  | C | A | 2 | 0.633 | 0.633 | 0.946 | 0.946 | 0.199 | 0.337 | 0.337 | 0.883 | 0.883 | 0.472 |
| 118987670 | rs2532798  | G | T | 3 |       |       | 0.871 | 0.871 |       | 0.328 | 0.328 | 0.945 | 0.945 | 0.484 |
| 118987781 | rs7393602  | C | A | 2 | 0.557 | 0.557 | 0.919 | 0.919 | 0.254 | 0.214 | 0.253 | 0.816 | 0.797 | 0.669 |
| 118988392 | rs58610313 | G | C | 2 | 0.836 | 0.836 | 1.040 | 1.040 | 0.078 | 0.804 | 0.804 | 1.055 | 1.055 | 0.095 |
| 118988797 | rs78664257 | A | G | 2 | 0.896 | 0.896 | 0.982 | 0.982 | 0.048 | 0.318 | 0.372 | 0.858 | 0.767 | 0.498 |
| 118989162 | rs363324   | G | A | 3 |       |       | 0.874 | 0.874 |       | 0.342 | 0.342 | 0.947 | 0.947 | 0.466 |
| 118989519 | rs60694093 | A | G | 2 | 0.990 | 0.990 | 0.998 | 0.998 | 0.004 | 0.858 | 0.858 | 1.038 | 1.038 | 0.067 |
| 118989604 | rs3981210  | A | G | 2 | 0.650 | 0.650 | 0.949 | 0.949 | 0.187 | 0.364 | 0.364 | 0.889 | 0.889 | 0.439 |
| 118990297 | rs363325   | A | G | 2 | 0.646 | 0.646 | 0.948 | 0.948 | 0.190 | 0.364 | 0.364 | 0.889 | 0.889 | 0.439 |
| 118990516 | rs363326   | A | G | 2 | 0.646 | 0.646 | 0.948 | 0.948 | 0.190 | 0.342 | 0.342 | 0.884 | 0.884 | 0.467 |
| 118990782 | rs363327   | A | G | 2 | 0.676 | 0.676 | 0.953 | 0.953 | 0.170 | 0.364 | 0.364 | 0.889 | 0.889 | 0.439 |
| 118991126 | rs363328   | C | T | 2 | 0.650 | 0.650 | 0.949 | 0.949 | 0.187 | 0.384 | 0.384 | 0.893 | 0.893 | 0.416 |
| 118991550 | rs74159130 | A | G | 2 | 0.558 | 0.558 | 0.919 | 0.919 | 0.254 | 0.252 | 0.298 | 0.829 | 0.803 | 0.598 |
| 118991582 | rs363329   | T | C | 2 | 0.620 | 0.620 | 0.944 | 0.944 | 0.207 | 0.405 | 0.405 | 0.897 | 0.897 | 0.393 |
| 118991695 | rs2532799  | C | T | 3 |       |       | 0.869 | 0.869 |       | 0.334 | 0.334 | 0.946 | 0.946 | 0.476 |
| 118991727 | rs12414893 | T | C | 2 | 0.469 | 0.469 | 1.127 | 1.127 | 0.329 | 0.086 | 0.086 | 0.724 | 0.724 | 1.068 |
| 118991768 | rs12414919 | A | G | 2 | 0.469 | 0.469 | 1.127 | 1.127 | 0.329 | 0.086 | 0.086 | 0.724 | 0.724 | 1.068 |
| 118991774 | rs12414934 | A | G | 2 | 0.620 | 0.620 | 0.944 | 0.944 | 0.207 | 0.384 | 0.384 | 0.893 | 0.893 | 0.416 |
| 118992558 | rs10886050 | A | G | 3 |       |       | 0.836 | 0.836 |       | 0.611 | 0.611 | 0.969 | 0.969 | 0.214 |
| 118992584 | rs2619097  | C | A | 2 | 0.440 | 0.440 | 0.915 | 0.915 | 0.356 | 0.266 | 0.266 | 0.866 | 0.866 | 0.575 |
| 118993210 | rs363373   | C | T | 2 | 0.765 | 0.765 | 1.060 | 1.060 | 0.116 | 0.889 | 0.889 | 1.032 | 1.032 | 0.051 |
| 118994479 | rs10886051 | A | C | 3 |       |       | 0.858 | 0.858 |       | 0.526 | 0.526 | 0.961 | 0.961 | 0.279 |
| 118994530 | rs2532801  | A | G | 2 |       |       | 0.866 | 0.866 |       | 0.867 | 0.867 | 0.988 | 0.988 | 0.062 |
| 118994838 | rs363330   | G | A | 2 | 0.545 | 0.545 | 0.933 | 0.933 | 0.263 | 0.207 | 0.207 | 0.849 | 0.849 | 0.684 |
| 118996097 | rs7099849  | G | A | 2 | 0.866 | 0.866 | 0.975 | 0.975 | 0.062 | 0.108 | 0.169 | 0.762 | 0.730 | 0.967 |
| 118996115 | rs4081624  | C | A | 2 |       |       | 0.864 | 0.864 |       | 0.835 | 0.835 | 0.985 | 0.985 | 0.078 |
| 118997875 | rs2532802  | C | G | 2 | 0.945 | 0.945 | 1.013 | 1.013 | 0.025 | 0.909 | 0.909 | 0.975 | 0.975 | 0.041 |
| 118999932 | rs2283135  | G | C | 2 | 0.747 | 0.747 | 0.953 | 0.953 | 0.127 | 0.118 | 0.188 | 0.768 | 0.730 | 0.927 |
| 119000528 | rs60912143 | A | G | 2 | 0.738 | 0.738 | 1.071 | 1.071 | 0.132 | 0.558 | 0.558 | 0.870 | 0.870 | 0.254 |
| 119000572 | rs60543597 | A | G | 2 | 0.127 | 0.127 | 0.901 | 0.901 | 0.898 | 0.621 | 0.621 | 0.965 | 0.965 | 0.207 |
| 119001817 | rs2619093  | C | T | 2 |       |       | 0.875 | 0.875 |       | 0.360 | 0.360 | 0.941 | 0.941 | 0.444 |

|           |             |   |   |   |       |       |       |       |       |       |       |       |       |       |
|-----------|-------------|---|---|---|-------|-------|-------|-------|-------|-------|-------|-------|-------|-------|
| 119002489 | rs149461310 | T | C | 2 | 0.789 | 0.789 | 0.959 | 0.959 | 0.103 | 0.099 | 0.099 | 0.747 | 0.747 | 1.004 |
| 119002540 | rs11197932  | A | G | 3 |       |       | 0.875 | 0.875 |       | 0.668 | 0.668 | 0.974 | 0.974 | 0.175 |
| 119002667 | rs363332    | A | G | 3 |       |       | 0.874 | 0.874 |       | 0.634 | 0.634 | 0.972 | 0.972 | 0.198 |
| 119003161 | rs61560104  | G | A | 2 | 0.859 | 0.859 | 1.036 | 1.036 | 0.066 | 0.670 | 0.670 | 0.904 | 0.904 | 0.174 |
| 119003308 | rs2240779   | G | C | 2 | 0.753 | 0.753 | 0.952 | 0.952 | 0.123 | 0.082 | 0.082 | 0.736 | 0.736 | 1.089 |
| 119003564 | rs363387    | G | T | 2 | 0.749 | 0.749 | 0.952 | 0.952 | 0.125 | 0.082 | 0.082 | 0.736 | 0.736 | 1.084 |
| 119004079 | rs363390    | C | G | 3 |       |       | 0.877 | 0.877 |       | 0.652 | 0.652 | 0.973 | 0.973 | 0.186 |
| 119004995 | rs363334    | G | C | 2 |       |       | 0.868 | 0.868 |       | 0.815 | 0.815 | 0.984 | 0.984 | 0.089 |
| 119006945 | rs2283136   | G | A | 2 | 0.741 | 0.741 | 0.952 | 0.952 | 0.130 | 0.115 | 0.200 | 0.763 | 0.708 | 0.940 |
| 119007385 | rs363397    | G | C | 2 | 0.818 | 0.818 | 0.966 | 0.966 | 0.087 | 0.116 | 0.200 | 0.763 | 0.710 | 0.937 |
| 119007549 | rs2283137   | T | C | 3 |       |       | 0.883 | 0.883 |       | 0.638 | 0.638 | 0.972 | 0.972 | 0.195 |
| 119007980 | rs363336    | A | C | 2 | 0.818 | 0.818 | 0.966 | 0.966 | 0.087 | 0.127 | 0.195 | 0.769 | 0.728 | 0.897 |
| 119008485 | rs363337    | C | T | 2 | 0.061 | 0.061 | 0.884 | 0.884 | 1.213 | 0.759 | 0.759 | 0.979 | 0.979 | 0.120 |
| 119008728 | rs2299615   | G | A | 2 | 0.822 | 0.822 | 0.967 | 0.967 | 0.085 | 0.113 | 0.215 | 0.759 | 0.687 | 0.948 |
| 119008871 | rs363399    | C | T | 3 |       |       | 0.886 | 0.886 |       | 0.684 | 0.684 | 0.976 | 0.976 | 0.165 |
| 119008896 | rs363400    | A | C | 2 | 0.822 | 0.822 | 0.967 | 0.967 | 0.085 | 0.113 | 0.215 | 0.759 | 0.687 | 0.948 |
| 119009389 | rs363338    | C | T | 2 |       |       | 0.882 | 0.882 |       | 0.397 | 0.397 | 0.946 | 0.946 | 0.401 |
| 119009631 | rs363404    | T | C | 3 |       |       | 0.881 | 0.881 |       | 0.637 | 0.637 | 0.972 | 0.972 | 0.196 |
| 119009912 | rs3753127   | A | G | 2 | 0.999 | 0.999 | 1.000 | 1.000 | 0.001 | 0.929 | 0.929 | 0.980 | 0.980 | 0.032 |
| 119009966 | rs2532805   | G | A | 2 | 0.744 | 0.744 | 0.953 | 0.953 | 0.128 | 0.114 | 0.249 | 0.764 | 0.656 | 0.942 |
| 119010185 | rs2803815   | C | T | 2 | 0.740 | 0.740 | 0.952 | 0.952 | 0.131 | 0.140 | 0.274 | 0.779 | 0.662 | 0.853 |
| 119010224 | rs7899301   | A | G | 2 | 0.814 | 0.814 | 0.957 | 0.957 | 0.089 | 0.701 | 0.701 | 1.084 | 1.084 | 0.154 |
| 119010412 | rs363339    | T | C | 2 | 0.072 | 0.072 | 0.887 | 0.887 | 1.145 | 0.732 | 0.732 | 0.976 | 0.976 | 0.135 |
| 119010413 | rs363340    | C | T | 2 | 0.072 | 0.072 | 0.887 | 0.887 | 1.145 | 0.732 | 0.732 | 0.976 | 0.976 | 0.135 |
| 119010422 | rs363405    | A | G | 2 | 0.888 | 0.888 | 1.029 | 1.029 | 0.052 | 0.984 | 0.984 | 1.005 | 1.005 | 0.007 |
| 119010465 | rs363341    | T | C | 2 |       | 0.050 | 0.882 | 0.882 |       | 0.784 | 0.784 | 0.982 | 0.982 | 0.106 |
| 119011795 | rs17095973  | A | G | 2 | 0.898 | 0.898 | 1.027 | 1.027 | 0.047 | 0.977 | 0.977 | 0.993 | 0.993 | 0.010 |
| 119014929 | rs363419    | T | C | 3 | 0.698 | 0.514 | 0.959 | 0.900 | 0.156 | 0.528 | 0.528 | 1.069 | 1.069 | 0.278 |
| 119018031 | rs363221    | T | C | 3 | 0.880 | 0.880 | 0.984 | 0.984 | 0.055 | 0.653 | 0.653 | 1.047 | 1.047 | 0.185 |
| 119018260 | rs79731304  | C | T | 3 | 0.876 | 0.876 | 1.017 | 1.017 | 0.058 | 0.583 | 0.583 | 1.059 | 1.059 | 0.234 |
| 119018679 | rs2283138   | G | A | 2 | 0.192 | 0.192 | 0.888 | 0.888 | 0.717 | 0.888 | 0.881 | 0.986 | 1.025 | 0.051 |
| 119019126 | rs929493    | C | T | 2 | 0.680 | 0.680 | 0.969 | 0.969 | 0.167 | 0.827 | 0.827 | 1.018 | 1.018 | 0.082 |
| 119019177 | rs1860404   | T | C | 2 |       |       | 0.804 | 0.804 |       | 0.096 | 0.096 | 1.180 | 1.180 | 1.019 |
| 119019467 | rs363251    | G | A | 2 | 0.263 | 0.263 | 1.068 | 1.068 | 0.581 | 0.894 | 0.825 | 1.008 | 0.972 | 0.049 |

|           |            |   |   |   |       |       |       |       |       |       |       |       |       |       |
|-----------|------------|---|---|---|-------|-------|-------|-------|-------|-------|-------|-------|-------|-------|
| 119019658 | rs11197936 | G | A | 2 | 0.485 | 0.485 | 1.042 | 1.042 | 0.314 | 0.006 | 0.038 | 1.186 | 1.174 | 2.242 |
| 119022573 | rs363224   | C | A | 2 | 0.503 | 0.503 | 1.040 | 1.040 | 0.299 | 0.782 | 0.782 | 0.983 | 0.983 | 0.107 |
| 119024502 | rs363225   | C | T | 2 | 0.653 | 0.653 | 1.026 | 1.026 | 0.185 | 0.790 | 0.790 | 0.984 | 0.984 | 0.103 |
| 119028940 | rs2532810  | A | G | 3 | 0.981 | 0.980 | 0.997 | 1.003 | 0.008 | 0.634 | 0.677 | 0.949 | 0.949 | 0.198 |
| 119032488 | rs363231   | A | G | 3 | 0.999 | 0.959 | 1.000 | 1.006 | 0.001 | 0.573 | 0.635 | 0.939 | 0.939 | 0.242 |
| 119043554 | rs363294   | T | C | 3 | 0.927 | 0.963 | 0.990 | 0.995 | 0.033 | 0.475 | 0.572 | 0.924 | 0.925 | 0.323 |
| 119051788 | rs2532812  | A | G | 3 | 0.827 | 0.800 | 1.025 | 1.031 | 0.082 | 0.709 | 0.758 | 0.959 | 0.962 | 0.149 |
| 119064546 | rs2490629  | T | C | 3 | 0.790 | 0.790 | 1.030 | 1.030 | 0.102 | 0.696 | 0.762 | 0.957 | 0.961 | 0.157 |
