# Supplementary material
Source: PubMed Central journal article supplement (PMC4965405)

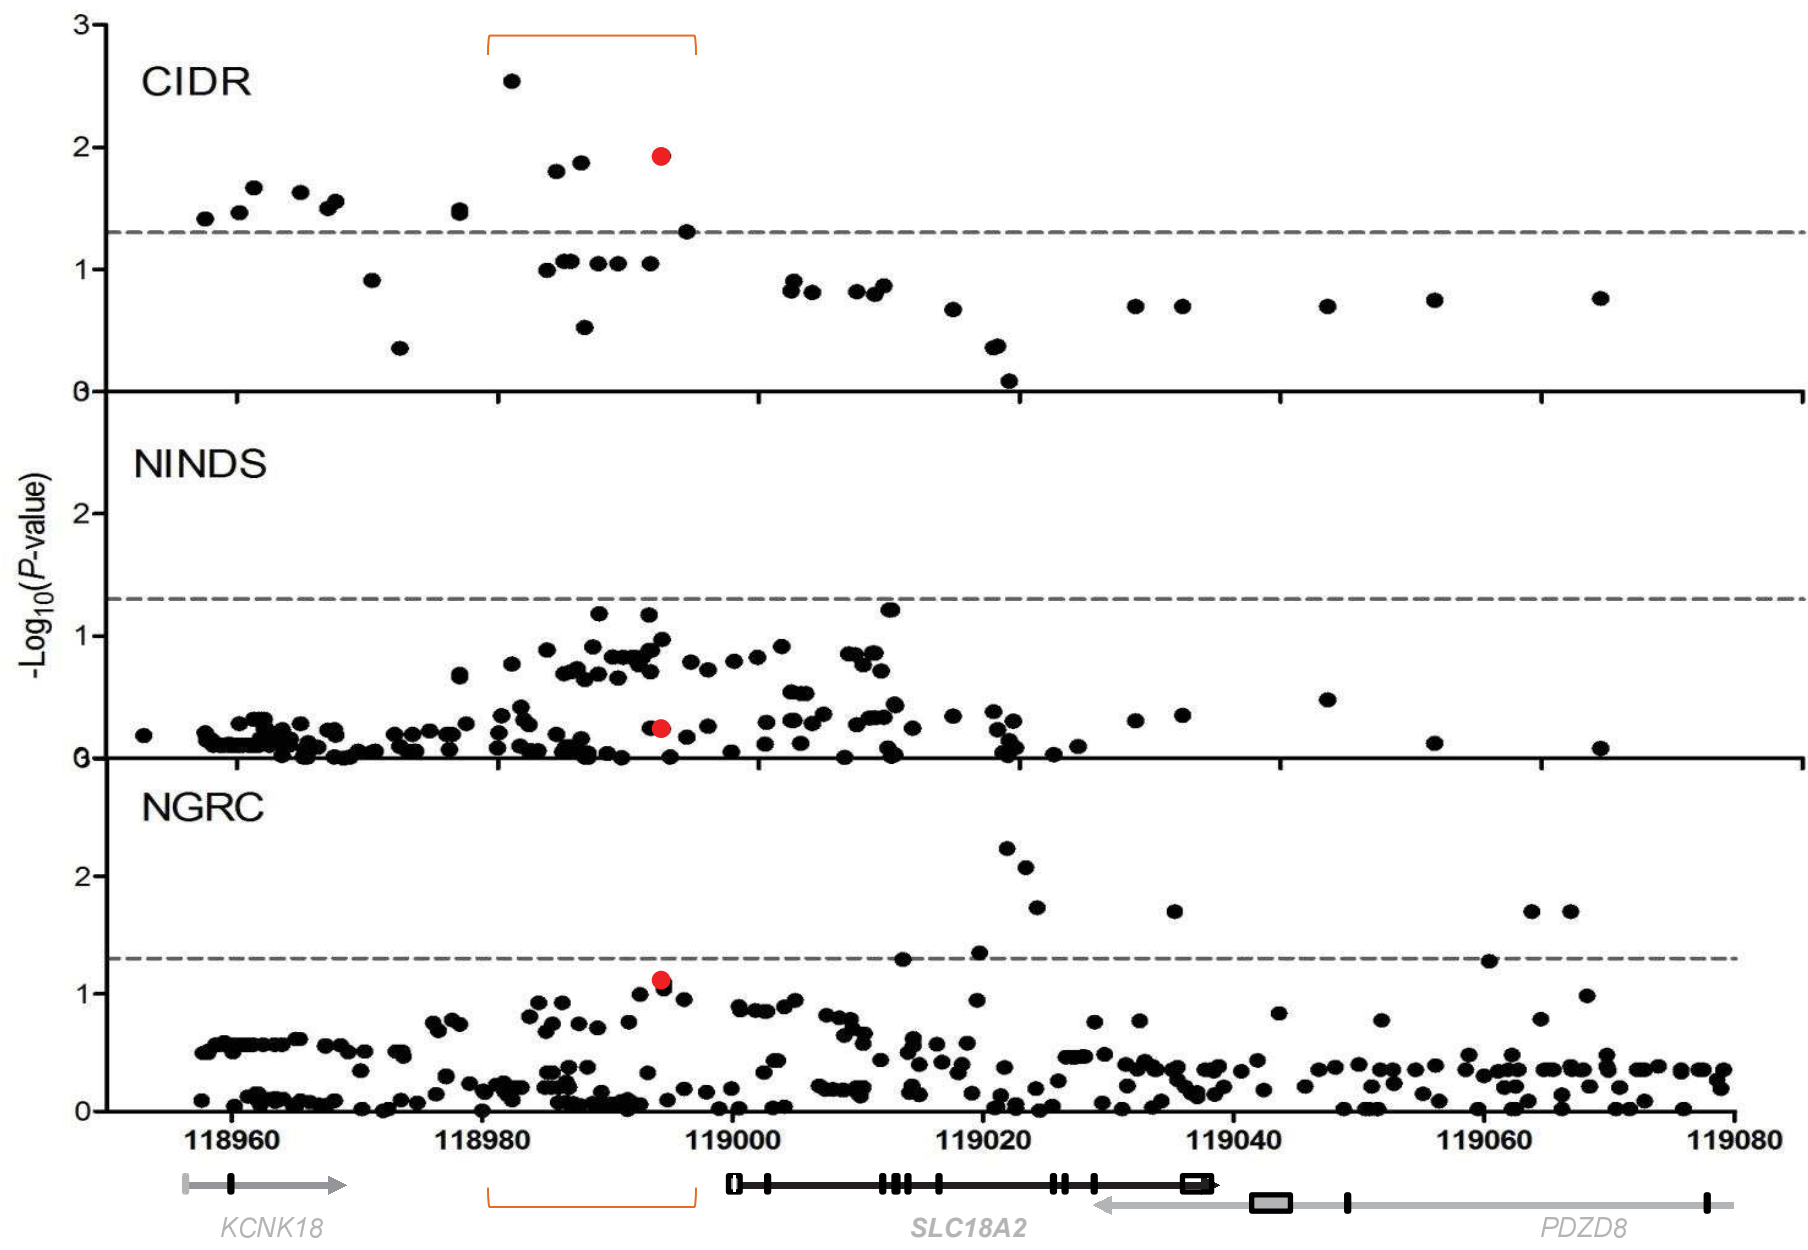

Supplement: 13311_2016_435_MOESM3_ESM.pdf [file 13311_2016_435_MOESM3_ESM.pdf]
